# Supplementary material for: Permselective ion electrosorption of subnanometer pores at high molar strength enables capacitive deionization of saline water
Source: Royal Society of Chemistry journal article supplement (doi:10.1039/c9se00996e), 2019-12-16
Supplement: c9se00996e1.pdf [file c9se00996e1.pdf]

*Supplementary Information*

**Permselective ion electrosorption  
of subnanometer pores at high molar strength  
enables capacitive deionization of saline water**

Sheng Bi,<sup>1,2,+</sup> Yuan Zhang,<sup>3,4,+</sup> Luca Cervini,<sup>5</sup> Tangming Mo,<sup>1,2</sup>  
John M. Griffin,<sup>5,6</sup> Volker Presser,<sup>3,4,\*</sup> Guang Feng<sup>1,2,\*</sup>

<sup>1</sup> State Key Laboratory of Coal Combustion, School of Energy and Power Engineering, Huazhong University of Science and Technology (HUST), Wuhan 430074, China.

<sup>2</sup> Nano Interface Centre for Energy, School of Energy and Power Engineering, HUST, 430074, China.

<sup>3</sup> INM - Leibniz Institute for New Materials, Campus D2 2, 66123 Saarbrücken, Germany.

<sup>4</sup> Department of Materials Science and Engineering, Saarland University, Campus D2 2, 66123 Saarbrücken, Germany.

<sup>5</sup> Department of Chemistry, Lancaster University, Lancaster, LA1 4YB, United Kingdom.

<sup>6</sup> Materials Science Institute, Lancaster University, Lancaster, LA1 4YB, United Kingdom.

<sup>+</sup> These authors contributed equally: Bi Sheng, Yuan Zhang.

<sup>\*</sup> Corresponding authors. Email: volker.presser@leibniz-inm.de (VP); gfeng@hust.edu.cn (GF)

---

## 1. Data for the molecular dynamics simulation setup

**Table S1.** The number of ion pairs ( $n_{\text{ion pair}}$ ) and water molecules ( $n_{\text{water}}$ ) in each molecular dynamics (MD) simulation system.

| Pore size (nm) | $n_{\text{ion pair}}$ | $n_{\text{water}}$ |
|----------------|-----------------------|--------------------|
| 0.42           | 163                   | 4522               |
| 0.44           | 168                   | 4661               |
| 0.47           | 171                   | 4732               |
| 0.5            | 172                   | 4788               |
| 0.53           | 174                   | 4836               |
| 0.57           | 178                   | 4953               |
| 0.59           | 180                   | 4991               |
| 0.62           | 181                   | 5040               |
| 0.65           | 185                   | 5150               |
| 0.77           | 197                   | 5469               |
| 0.97           | 212                   | 5892               |
| 1.17           | 230                   | 6401               |
| 1.37           | 246                   | 6818               |
| 1.57           | 263                   | 7300               |
| 1.77           | 278                   | 7735               |

## 2. Characterization of carbons and cell setup

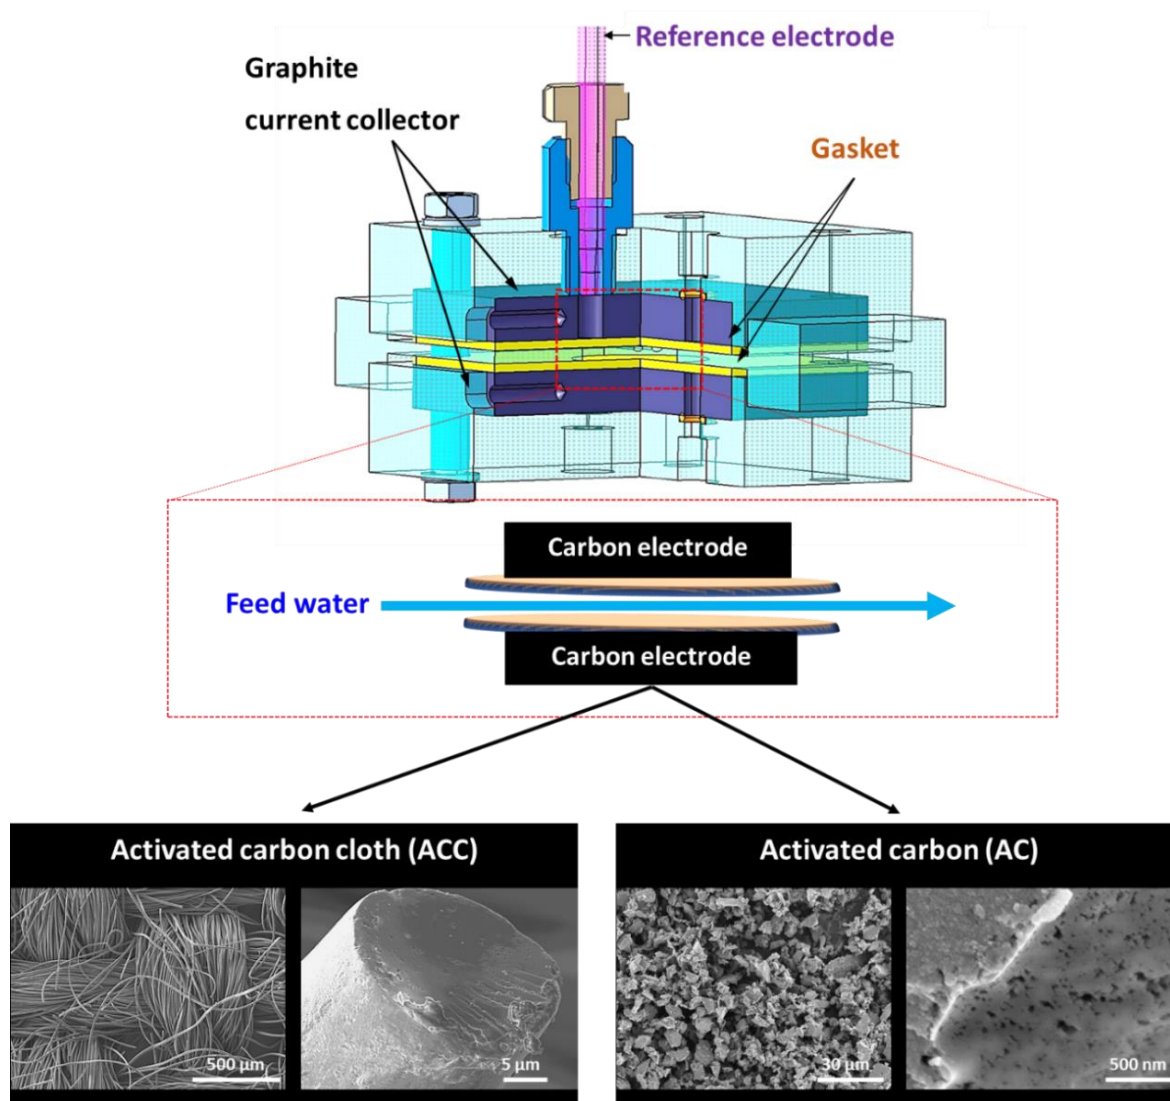

**Figure S1.** Schematic view of the CDI cell and scanning electron micrographs of carbon electrode materials.

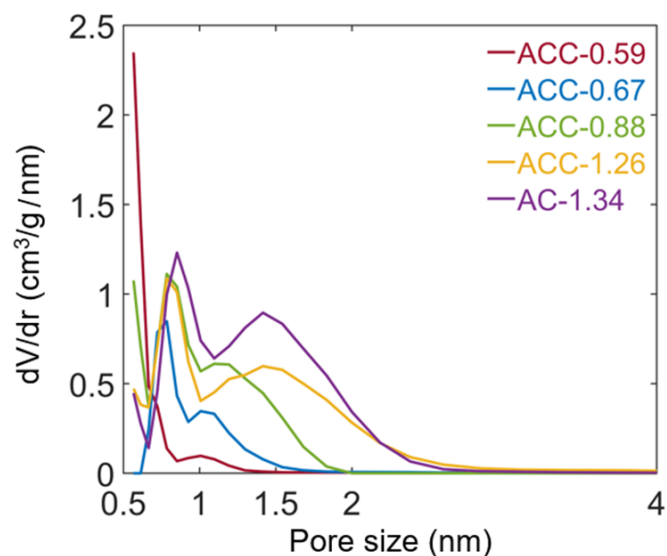

**Figure S2. Differential pore size distribution.** Data are obtained from nitrogen gas sorption isotherms at -196 °C, calculated by applying quenched solid density functional theory (QSDFT) and assuming pores have slit shape.

**Table S2.** Specific surface area (BET and DFT), total pore volume, and volume-weighted pore size of ACC-0.59, ACC-0.67, ACC-0.88, ACC-1.26, and AC-1.34.

|                 | SSA BET<br>(m <sup>2</sup> /g) | SSA DFT<br>(m <sup>2</sup> /g) | Pore volume<br>(cm <sup>3</sup> /g) | d <sub>25</sub><br>(nm) | d <sub>50</sub><br>(nm) | d <sub>75</sub><br>(nm) | d <sub>75</sub> -d <sub>25</sub><br>(nm) |
|-----------------|--------------------------------|--------------------------------|-------------------------------------|-------------------------|-------------------------|-------------------------|------------------------------------------|
| <b>ACC-0.59</b> | 916                            | 1032                           | 0.34                                | 0.55                    | 0.59                    | 0.68                    | 0.12                                     |
| <b>ACC-0.67</b> | 1478                           | 1550                           | 0.56                                | 0.45                    | 0.67                    | 0.86                    | 0.41                                     |
| <b>ACC-0.88</b> | 2070                           | 1876                           | 0.81                                | 0.64                    | 0.88                    | 1.19                    | 0.55                                     |
| <b>ACC-1.26</b> | 2794                           | 2191                           | 1.22                                | 0.89                    | 1.26                    | 1.61                    | 0.72                                     |
| <b>AC-1.34</b>  | 2104                           | 1756                           | 1.00                                | 0.86                    | 1.34                    | 1.80                    | 0.94                                     |

**Table S3.** CHN-O elemental analysis of ACC-0.59, ACC-0.67, ACC-0.88, ACC-1.26, and AC-1.34 (unit: mass%). “n.d.” demarks values below the detection limit of the system (“not detectable”).

|                 | <b>C</b> | <b>H</b> | <b>N</b> | <b>O</b> |
|-----------------|----------|----------|----------|----------|
| <b>ACC-0.59</b> | >94      | n.d.     | <1       | <6       |
| <b>ACC-0.67</b> | >96      | <1       | <0.1     | <2       |
| <b>ACC-0.88</b> | >96      | <2       | <0.2     | <2       |
| <b>ACC-1.26</b> | >96      | <1       | n.d      | <3       |
| <b>AC-1.34</b>  | >95      | <1       | n.d      | <4       |

### 3. Desalination performance measurements with aqueous NaCl solution

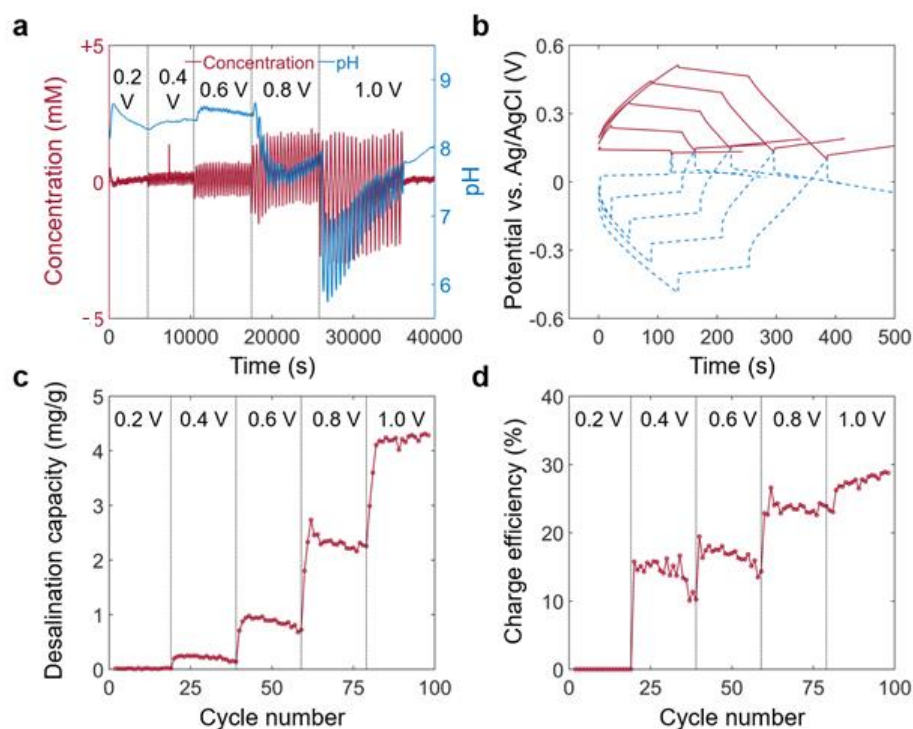

**Figure S3.** CDI measurement for ACC-0.59 carbon cloth in 800 mM NaCl. **a**, Concentration change (relative to 800 mM) and pH profile. **b**, Galvanostatic charging and discharging for the working electrode (red line) and counter electrode (blue dash line). **c-d**, Desalination capacity (**c**) and charge efficiency (**d**) profile at each cycle.

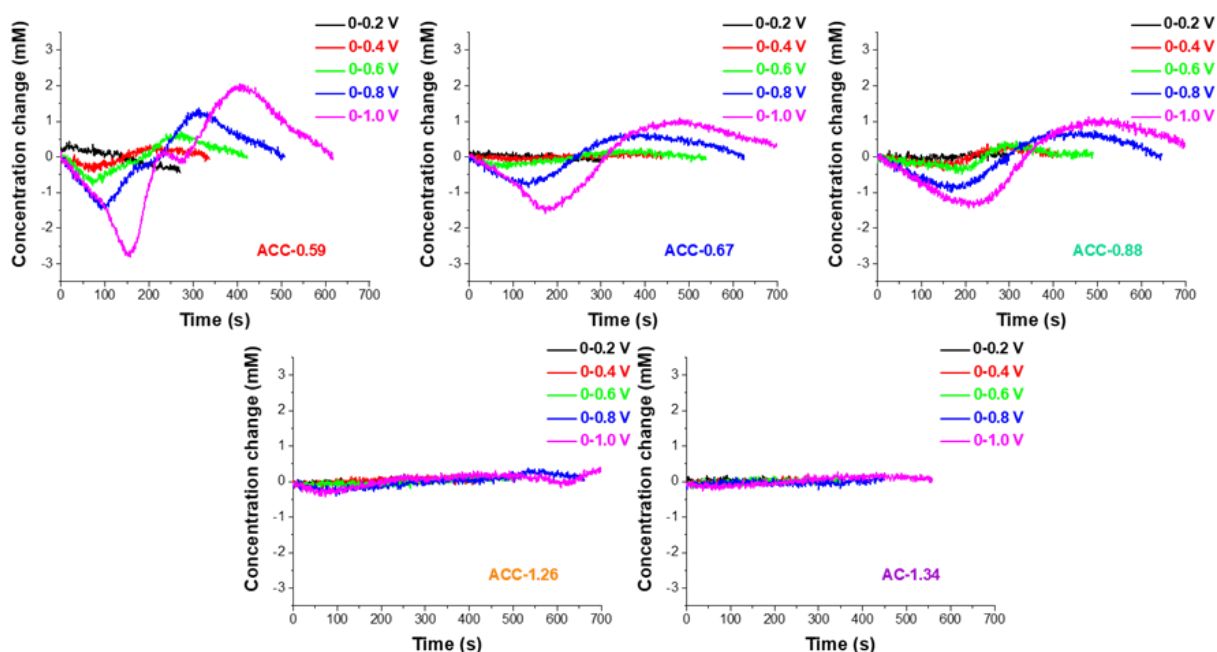

**Figure S4.** Representative concentration change pattern for different carbon electrode materials in 800 mM NaCl.

#### 4. Basic electrochemical characterization

To determine the basic electrochemical properties of ACC electrodes in 2 M KCl system, half-cell characterization was carried out with a custom-built cell using spring-loaded titanium pistons. To assemble the cell, a 12 mm diameter disk of the ACC electrode material (around 20 mg) was cut and employed as the working electrode. 13 mm diameter of glass fiber mat (GF/A, Whatman) was employed as the separator. As for the counter-electrode, a free-standing YP-80F/PTFE 95:5 electrode (thickness: 650  $\mu\text{m}$ ) was used. 12 mm diameter of graphite foil was applied as current collectors. The aqueous 2 M KCl solution was inserted into the cell by vacuum filling with a syringe, and an Ag/AgCl reference electrode (3 M KCl, BASi) was located at the side of the cell body and assembled close to working electrode and counter electrode. The cell was characterized by using VSP300 potentiostat/galvanostat (Bio-Logic). For cyclic voltammetry, the cell was cycled between -0.5 V and +0.5 V vs. Ag/AgCl at the scan rate of 1 mV/s. For galvanostatic charge/discharge, the specific current of 0.1 A/g was applied to the electrode with potential applied from 0 V vs. Ag/AgCl to the cut-off potentials of +0.2 V, +0.4 V, +0.6 V, +0.8 V, and +1.0 V vs. Ag/AgCl (ten cycles for each potential range). The specific capacitance of the electrode is calculated according to Eq. S1.

$$C_{\text{specific}} = \frac{1}{U_m} \int_{t_1}^{t_2} I dt \quad (\text{Eq. S1})$$

where  $U$  is the voltage difference during the discharge process (excluding the Ohmic drop),  $m$  is mass of the working electrode,  $t_2-t_1$  is the discharge time interval, and  $I$  is the applied discharge current.

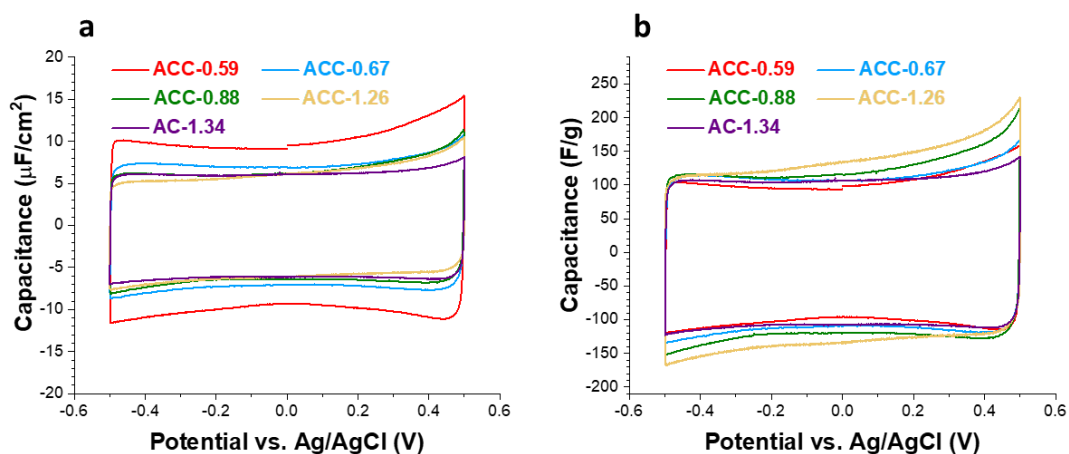

**Figure S5. Cyclic voltammogram measurements.** Performed at 1 mV/s for five carbon electrodes in 2 M KCl water solution. ACC and AC carbons are applied as working electrodes, and YP-80F+5% PTFE electrodes are applied as counter electrodes. **a**, normalized to specific surface area; **b**, normalized to electrode mass.

## 5. In-pore ions under different polarizations

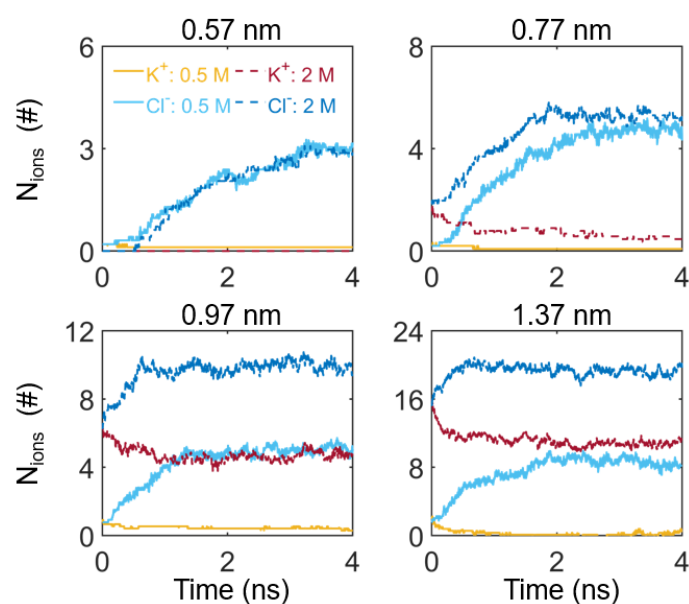

**Figure S6. Time evolution of the number of cation and anion in the positively charged micropores.** The applied voltage between the positive and negative electrode is set to 1.0 V. Dark red and blue solid lines are, respectively, results for the cation and anion at 2 M concentration. Yellow and light blue dashed lines are for cation and anion at 0.5 M concentration. These results are evaluated on-the-fly during the charging simulations of each micropore.



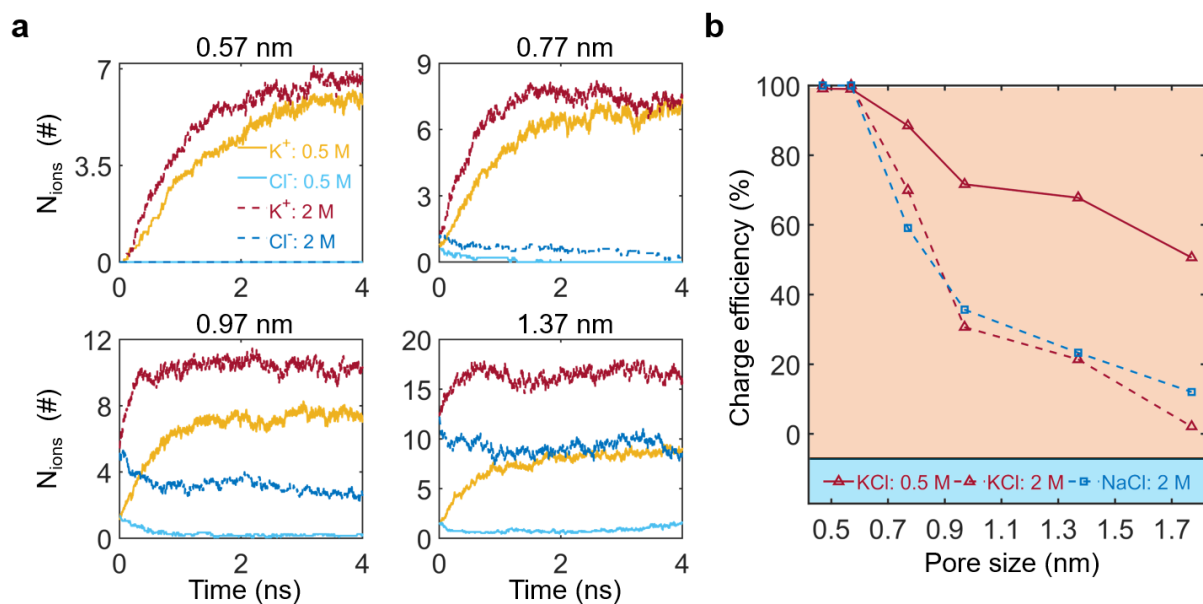

**Figure S7. Molecular understanding of ion permselectivity by micropores at 1.5 V.** **a**, Time evolution of the number of cation and anion in the negatively charged micropores. Dark red and blue solid lines are, respectively, results for the cation and anion at 2 M. Yellow and light blue dashed lines are for cation and anion at 0.5 M. These results are evaluated during the charging simulations of each micropore. **b**, Charge efficiency, as a function of pore size. Red solid and dashed lines with triangle markers represent results of micropores in aqueous 0.5 M and 2 M KCl solutions, respectively. Blue dashed line with squares: 2 M NaCl solution.

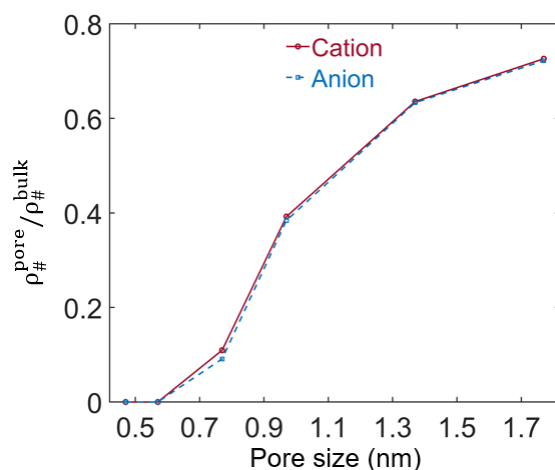

**Figure S8. Normalized in-pore ion density at PZC.** The in-pore ion density is scaled by bulk ion density. Solid and dash lines are, respectively, for the cation and anion at 2 M.

## 6. Water distribution surrounding ions in bulk and inside large pores

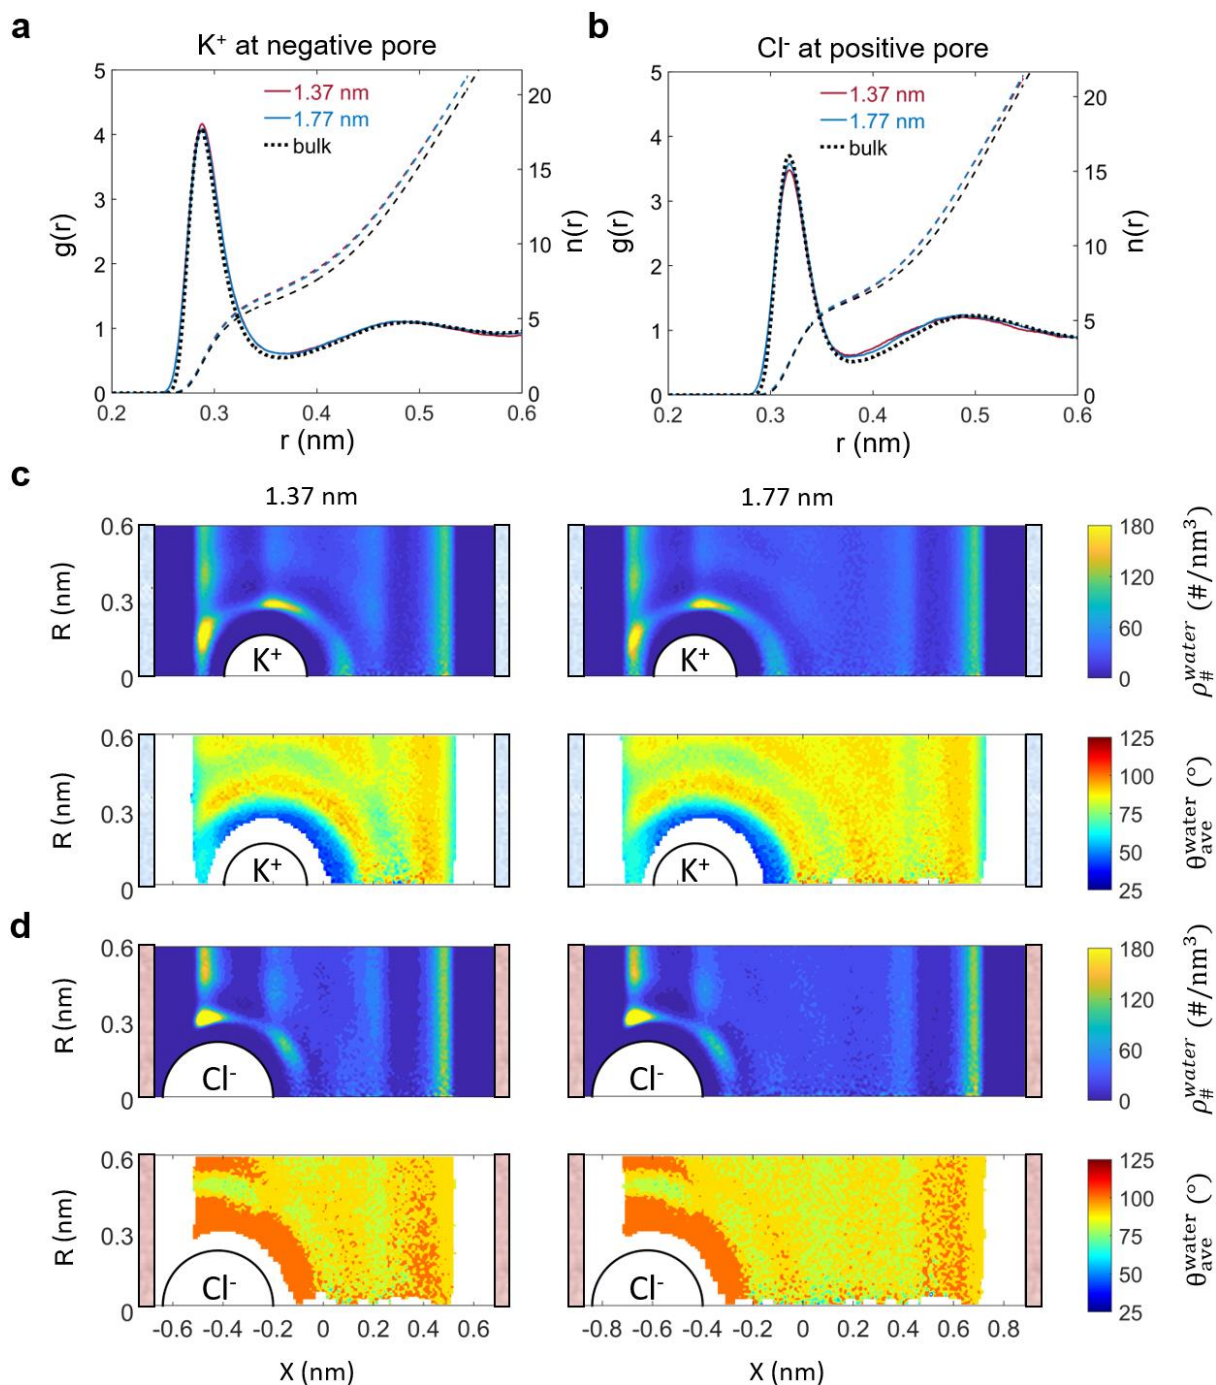

**Figure S9. Structure of hydration shells of counter-ions in >1 nm polarized micropores.** a-b, Radial distribution function,  $g(r)$  (solid lines, left Y-axis), and cumulative distribution function,  $n(r)$  (dashed, right Y-axis) of hydrated  $K^+$  ions (left panel) and  $Cl^-$  ions (right panel) in negatively and positively polarized pores, respectively. Black dot lines are results for ions in bulk simulations. c-d, Pseudo-2D number density distributions and orientations of water molecules around an ion in micropores of 1.37 nm and 1.77 nm; the upper two rows and the lower two are results (first number density, then orientation distributions) for water around a  $K^+$  ion under negative polarization and for water around a  $Cl^-$  ion under positive polarization, respectively.  $X = 0$  corresponds to the central position of the pore.

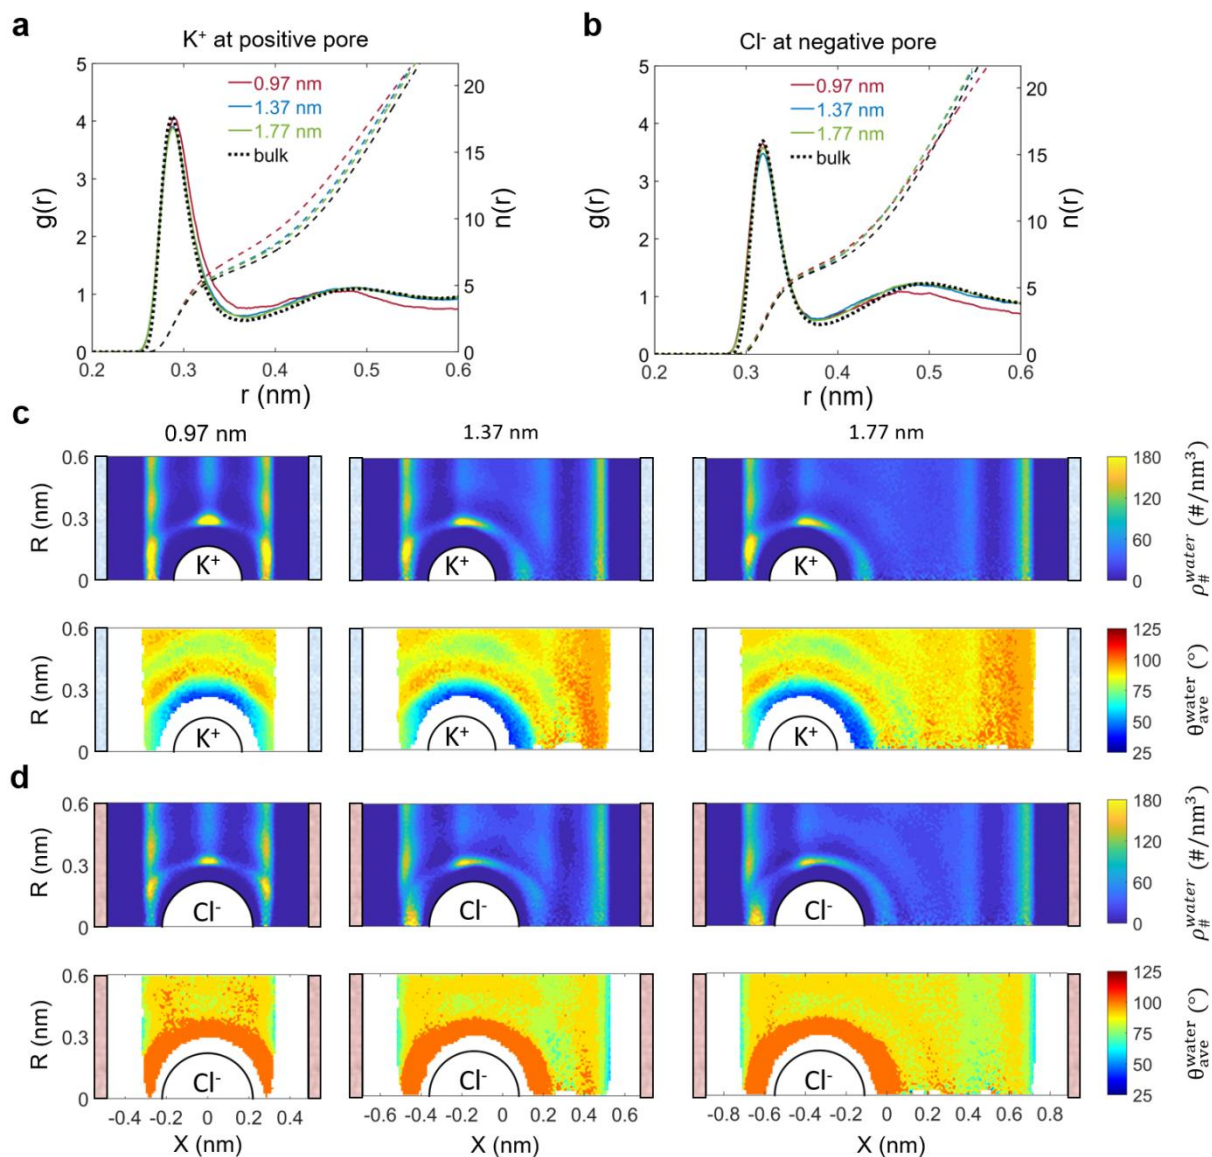

**Figure S10. Structure of hydration shells of co-ions in polarized micropores.** **a-b**, Radial distribution function,  $g(r)$  (solid lines, left Y-axis), and cumulative distribution function,  $n(r)$  (dashed, right Y-axis) of hydrated  $K^+$  ions (left panel) and  $Cl^-$  ions (right panel) in positively and negatively polarized pores, respectively. Black dot lines are results for ions in bulk simulations. **c-d**, Pseudo-2D number density (upper panel) and orientation (lower panel) distributions of water molecules around a co-ion in micropores of different pore sizes under positive and negative polarizations, respectively. We show  $K^+$  ion (**c**) in positively charged pores and  $Cl^-$  ion (**d**) in negatively charged pores.  $X = 0$  corresponds to the central position of the pore.

---

## 7. Dynamics of ions inside charged pores

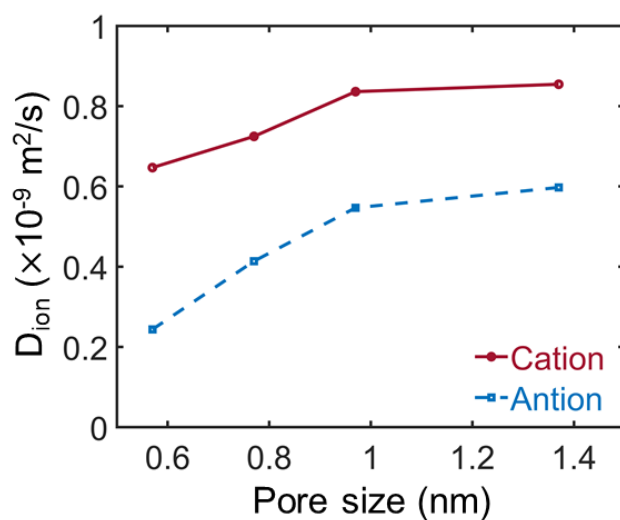

**Figure S11. In-pore ion diffusion.** Self-diffusion coefficients of cations and anions in negatively and positively charged pores, respectively. The voltage applied between the positive and negative electrode is set at 1.0 V.
